# Supplementary material for: Socioeconomic, Eating- and Health-Related Limitations of Food Consumption among Polish Women 60+ Years: The ‘ABC of Healthy Eating’ Project
Source: MDPI journal article supplement (doi:10.3390/nu14010051), 2021-12-23
Supplement: s1 [file s1]

## Supplementary Materials

**Table S1.** Limitations of food consumption among Polish women 60+ years – data for the single components of the Socioeconomic Status Index, Eating-related Limitations Score and the Health-related Limitations Score (% of the sample or mean  $\pm$  SD).

| Variables                                                                  | Consumption of                     |                      |          |                         |                      |          |                                     |                      |          |                                 |                      |          |                                                                            |                      |          |
|----------------------------------------------------------------------------|------------------------------------|----------------------|----------|-------------------------|----------------------|----------|-------------------------------------|----------------------|----------|---------------------------------|----------------------|----------|----------------------------------------------------------------------------|----------------------|----------|
|                                                                            | fruit/vegetables<br>(servings/day) |                      |          | dairy<br>(servings/day) |                      |          | meat/poultry/fish<br>(servings/day) |                      |          | legumes/eggs<br>(servings/week) |                      |          | water and beverages<br>industrially unsweetened <sup>e</sup><br>(cups/day) |                      |          |
|                                                                            | < 2                                | $\geq 2$             | <i>p</i> | < 1                     | $\geq 1$             | <i>p</i> | < 1                                 | $\geq 1$             | <i>p</i> | < 2                             | $\geq 2$             | <i>p</i> | < 6                                                                        | $\geq 6$             | <i>p</i> |
| Sample size                                                                | 47/34 <sup>#</sup>                 | 266/230 <sup>#</sup> |          | 57/41 <sup>#</sup>      | 256/223 <sup>#</sup> |          | 72/60 <sup>#</sup>                  | 241/204 <sup>#</sup> |          | 105/90 <sup>#</sup>             | 208/174 <sup>#</sup> |          | 167/134 <sup>#</sup>                                                       | 146/130 <sup>#</sup> |          |
| Age, years                                                                 | 69.6 $\pm$ 5.7                     | 69.4 $\pm$ 5.6       | ns       | 70.2 $\pm$ 5.6          | 69.3 $\pm$ 5.6       | ns       | 69.1 $\pm$ 5.6                      | 69.6 $\pm$ 5.6       | ns       | 70.1 $\pm$ 6.1                  | 69.1 $\pm$ 5.3       | ns       | 70.0 $\pm$ 5.7                                                             | 68.8 $\pm$ 5.5       | ns       |
| Age categories:                                                            |                                    |                      |          |                         |                      |          |                                     |                      |          |                                 |                      |          |                                                                            |                      |          |
| 60-69 y                                                                    | 68                                 | 62                   | ns       | 56                      | 64                   | ns       | 64                                  | 62                   | ns       | 56                              | 66                   | ns       | 60                                                                         | 65                   | ns       |
| 70-89 y                                                                    | 32                                 | 38                   |          | 44                      | 36                   |          | 36                                  | 38                   |          | 44                              | 34                   |          | 40                                                                         | 35                   |          |
| <b>Components of the Socioeconomic Status Index (SESI)</b>                 |                                    |                      |          |                         |                      |          |                                     |                      |          |                                 |                      |          |                                                                            |                      |          |
| Place of residence:                                                        |                                    |                      |          |                         |                      |          |                                     |                      |          |                                 |                      |          |                                                                            |                      |          |
| city                                                                       | 96                                 | 78                   |          | 77                      | 82                   |          | 85                                  | 80                   |          | 84                              | 79                   |          | 80                                                                         | 82                   |          |
| town                                                                       | 0                                  | 9                    | < 0.05   | 9                       | 7                    | ns       | 10                                  | 7                    | ns       | 6                               | 8                    | ns       | 5                                                                          | 10                   | ns       |
| village                                                                    | 4                                  | 13                   |          | 14                      | 11                   |          | 6                                   | 14                   |          | 10                              | 13                   |          | 15                                                                         | 8                    |          |
| Self-reported economic situation of household:                             |                                    |                      |          |                         |                      |          |                                     |                      |          |                                 |                      |          |                                                                            |                      |          |
| I live very well                                                           | 4                                  | 17                   |          | 5                       | 17                   |          | 10                                  | 16                   |          | 11                              | 16                   |          | 18                                                                         | 11                   |          |
| I live well                                                                | 9                                  | 21                   |          | 14                      | 21                   |          | 22                                  | 19                   |          | 18                              | 20                   |          | 16                                                                         | 24                   |          |
| I live thriftily                                                           | 43                                 | 42                   | < 0.01   | 46                      | 41                   | < 0.05   | 44                                  | 41                   | ns       | 42                              | 42                   | ns       | 41                                                                         | 43                   | ns       |
| I live very thriftily                                                      | 32                                 | 16                   |          | 23                      | 18                   |          | 18                                  | 19                   |          | 23                              | 16                   |          | 20                                                                         | 17                   |          |
| I live poorly                                                              | 13                                 | 4                    |          | 12                      | 4                    |          | 6                                   | 5                    |          | 6                               | 5                    |          | 6                                                                          | 5                    |          |
| <b>Components of the Eating-related Limitations Score (E-LS)</b>           |                                    |                      |          |                         |                      |          |                                     |                      |          |                                 |                      |          |                                                                            |                      |          |
| Difficulties with self-feeding <sup>a</sup>                                | 11                                 | 6                    | ns       | 11                      | 6                    | ns       | 14                                  | 5                    | < 0.01   | 13                              | 3                    | < 0.01   | 8                                                                          | 5                    | ns       |
| Decrease in food intake <sup>b</sup>                                       | 32                                 | 19                   | < 0.05   | 28                      | 19                   | ns       | 22                                  | 20                   | ns       | 23                              | 20                   | ns       | 23                                                                         | 18                   | ns       |
| Feeling the taste of food in comparison with other people of the same age: |                                    |                      |          |                         |                      |          |                                     |                      |          |                                 |                      |          |                                                                            |                      |          |
| better                                                                     | 13                                 | 33                   |          | 30                      | 30                   |          | 29                                  | 31                   |          | 28                              | 32                   |          | 26                                                                         | 35                   |          |
| as good                                                                    | 70                                 | 56                   | < 0.05   | 51                      | 60                   | ns       | 61                                  | 57                   | ns       | 56                              | 59                   | ns       | 62                                                                         | 54                   | ns       |
| weaker                                                                     | 17                                 | 11                   |          | 19                      | 10                   |          | 10                                  | 12                   |          | 16                              | 9                    |          | 12                                                                         | 11                   |          |

|                                                                              |            |            |        |            |            |        |            |            |    |            |            |        |            |            |        |
|------------------------------------------------------------------------------|------------|------------|--------|------------|------------|--------|------------|------------|----|------------|------------|--------|------------|------------|--------|
| Appetite in comparison with other people of the same age:                    |            |            |        |            |            |        |            |            |    |            |            |        |            |            |        |
| better                                                                       | 2          | 20         |        | 12         | 18         |        | 14         | 18         |    | 11         | 20         |        | 13         | 22         |        |
| as good                                                                      | 57         | 55         | < 0.01 | 53         | 55         | ns     | 60         | 54         | ns | 51         | 57         | < 0.05 | 52         | 58         | < 0.01 |
| weaker                                                                       | 40         | 26         |        | 35         | 27         |        | 26         | 29         |    | 37         | 24         |        | 35         | 20         |        |
| No feeling satiety after eating almost the whole meal                        |            |            |        |            |            |        |            |            |    |            |            |        |            |            |        |
|                                                                              | 26         | 30         | ns     | 28         | 29         | ns     | 22         | 31         | ns | 24         | 32         | ns     | 35         | 22         | < 0.05 |
| <b>Components of the Health-related Limitations Score (H-LS)</b>             |            |            |        |            |            |        |            |            |    |            |            |        |            |            |        |
| Lives dependently <sup>c</sup>                                               | 6          | 3          | ns     | 7          | 3          | ns     | 1          | 4          | ns | 6          | 2          | ns     | 5          | 1          | ns     |
| Limited mobility <sup>d</sup>                                                | 2          | 0          | ns     | 4          | 0          | < 0.01 | 1          | 0          | ns | 2          | 0          | < 0.05 | 1          | 0          | ns     |
| Psychological stress or acute disease in the last 3 months                   | 40         | 32         | ns     | 33         | 34         | ns     | 26         | 36         | ns | 32         | 34         | ns     | 34         | 33         | ns     |
| Neuropsychological problems                                                  | 15         | 15         | ns     | 18         | 14         | ns     | 14         | 15         | ns | 18         | 13         | ns     | 16         | 14         | ns     |
| Taking more than 3 prescription drugs/day                                    | 43         | 44         | ns     | 60         | 41         | < 0.01 | 42         | 45         | ns | 48         | 42         | ns     | 44         | 44         | ns     |
| Pressure sores or skin ulcers                                                | 0          | 2          | ns     | 0          | 2          | ns     | 1          | 1          | ns | 2          | 1          | ns     | 2          | 0          | ns     |
| Weight loss greater than 3 kg in the last 3 months                           | 4          | 7          | ns     | 4          | 7          | ns     | 6          | 7          | ns | 7          | 7          | ns     | 6          | 8          | ns     |
| Self-reported health status in comparison with other people of the same age: |            |            |        |            |            |        |            |            |    |            |            |        |            |            |        |
| better                                                                       | 6          | 19         |        | 12         | 18         |        | 14         | 18         |    | 20         | 15         |        | 15         | 19         |        |
| as good                                                                      | 30         | 42         | < 0.05 | 32         | 42         | ns     | 46         | 39         | ns | 34         | 43         | ns     | 35         | 47         | < 0.05 |
| weaker                                                                       | 21         | 14         |        | 25         | 13         |        | 15         | 15         |    | 17         | 13         |        | 17         | 12         |        |
| does not know                                                                | 43         | 26         |        | 32         | 27         |        | 25         | 29         |    | 29         | 28         |        | 34         | 22         |        |
| Self-reported nutritional status:                                            |            |            |        |            |            |        |            |            |    |            |            |        |            |            |        |
| good                                                                         | 60         | 81         |        | 65         | 81         |        | 76         | 78         |    | 75         | 79         |        | 76         | 79         |        |
| malnourished                                                                 | 0          | 0          | < 0.01 | 0          | 0          | < 0.01 | 0          | 0          | ns | 0          | 0          | ns     | 0          | 0          | ns     |
| does not know                                                                | 40         | 19         |        | 35         | 19         |        | 24         | 22         |    | 25         | 21         |        | 24         | 21         |        |
| BMI (kg/m <sup>2</sup> )                                                     | 30.7 ± 5.2 | 29.6 ± 4.8 | ns     | 32.2 ± 5.7 | 29.3 ± 4.5 | 0.001  | 29.2 ± 4.3 | 30.0 ± 5.0 | ns | 29.7 ± 4.8 | 29.9 ± 4.9 | ns     | 30.1 ± 4.6 | 29.4 ± 5.1 | ns     |
| Body weight status (BMI, kg/m <sup>2</sup> ):                                |            |            |        |            |            |        |            |            |    |            |            |        |            |            |        |
| normal weight (18.5-24.9)                                                    | 11         | 14         |        | 6          | 16         |        | 17         | 13         |    | 16         | 13         |        | 11         | 18         |        |

|                                        |            |            |        |            |            |        |            |            |    |            |            |    |            |            |        |
|----------------------------------------|------------|------------|--------|------------|------------|--------|------------|------------|----|------------|------------|----|------------|------------|--------|
| overweight (25.0-29.9)                 | 41         | 41         | ns     | 34         | 43         | < 0.05 | 46         | 40         | ns | 39         | 43         | ns | 44         | 39         | ns     |
| obesity (≥ 30.0)                       | 48         | 44         |        | 60         | 42         |        | 36         | 47         |    | 45         | 45         |    | 46         | 44         |        |
| Waist circumference (cm)               | 97.0 ±12.3 | 93.5 ±10.9 | < 0.05 | 98.0 ±13.5 | 93.2 ±10.5 | 0.01   | 94.3 ±10.3 | 93.9 ±11.5 | ns | 94.7 ±11.4 | 93.7 ±11.1 | ns | 94.9 ±10.8 | 92.9 ±11.7 | < 0.05 |
| ≥ 88                                   | 80         | 66         | ns     | 76         | 67         | ns     | 72         | 67         | ns | 71         | 67         | ns | 73         | 63         | ns     |
| Strength of the right arm muscles (kg) | 19.8 ± 4.6 | 22.9 ± 6.1 | < 0.01 | 21.2 ± 5.2 | 22.7 ± 6.2 | ns     | 21.8 ± 5.6 | 22.7 ± 6.2 | ns | 22.7 ± 6.4 | 22.4 ± 5.9 | ns | 22.5 ± 6.0 | 22.5 ± 6.1 | ns     |
| ≤ 20                                   | 53         | 31         | < 0.05 | 38         | 33         | ns     | 38         | 32         | ns | 34         | 34         | ns | 37         | 30         | ns     |
| Strength of the left arm muscles (kg)  | 18.6 ± 4.6 | 20.7 ± 5.6 | < 0.05 | 19.2 ± 5.3 | 20.7 ± 5.6 | ns     | 20.5 ± 5.1 | 20.5 ± 5.7 | ns | 20.5 ± 6.1 | 20.4 ± 5.2 | ns | 19.9 ± 5.7 | 21.0 ± 5.3 | ns     |
| ≤ 20                                   | 74         | 46         | < 0.01 | 60         | 48         | ns     | 51         | 50         | ns | 51         | 49         | ns | 54         | 45         | ns     |

Notes: #data for BMI (Body Mass Index), waist circumference and the strength of the arms muscles; <sup>a</sup>self-feed with some difficulty or unable to eat without assistance; <sup>b</sup>in the last 3 months due to loss of appetite, digestive problems, chewing or swallowing difficulties etc.; <sup>c</sup>in nursing home or hospital; <sup>d</sup>is able to get out of bed /chair but does not go out; <sup>e</sup>water, juice, coffee, tea, etc., excluding sweetened beverages coca-cola type; p – the level of significance was assessed by Kruskal-Wallis test (continuous variables) or chi<sup>2</sup> test (categorical variables); ns – statistically insignificant.

**Table S2.** Odds ratios (ORs with 95% confidence interval (95% CI)) of food consumption by the selected components of the Eating-related and Health-related Limitation Scores among Polish women 60+ years.

| Limitations                                                                 |                                               | Consumption of                     |                        |                         |                       |                                     |                      |                                 |                       |                                                                               |                        |
|-----------------------------------------------------------------------------|-----------------------------------------------|------------------------------------|------------------------|-------------------------|-----------------------|-------------------------------------|----------------------|---------------------------------|-----------------------|-------------------------------------------------------------------------------|------------------------|
|                                                                             |                                               | fruit/vegetables<br>(servings/day) |                        | dairy<br>(servings/day) |                       | meat/poultry/fish<br>(servings/day) |                      | legumes/eggs<br>(servings/week) |                       | water and beverages<br>industrially<br>unsweetened <sup>b</sup><br>(cups/day) |                        |
|                                                                             |                                               | < 2                                | ≥ 2                    | < 1                     | ≥ 1                   | < 1                                 | ≥ 1                  | < 2                             | ≥ 2                   | < 6                                                                           | ≥ 6                    |
| Sample size                                                                 |                                               | 47/34 <sup>#</sup>                 | 266/230 <sup>#</sup>   | 57/41 <sup>#</sup>      | 256/223 <sup>#</sup>  | 72/60 <sup>#</sup>                  | 241/204 <sup>#</sup> | 105/90 <sup>#</sup>             | 208/174 <sup>#</sup>  | 167/134 <sup>#</sup>                                                          | 146/130 <sup>#</sup>   |
| <b>Components of the Eating-related Limitations Score (E-LS)</b>            |                                               |                                    |                        |                         |                       |                                     |                      |                                 |                       |                                                                               |                        |
| Decrease in food intake <sup>a</sup>                                        | yes (ref. no)                                 | 1                                  | 0.47*<br>(0.24; 0.95)  | 1                       | 0.58<br>(0.29; 1.13)  | 1                                   | 0.89<br>(0.47; 1.70) | 1                               | 0.83<br>(0.46; 1.47)  | 1                                                                             | 0.77<br>(0.44; 1.34)   |
| Feeling the taste of food in comparison with other people of the same age   | as good (ref. better)                         | 1                                  | 0.32*<br>(0.13; 0.81)  | 1                       | 1.28<br>(0.65; 2.54)  | 1                                   | 0.88<br>(0.48; 1.61) | 1                               | 0.95<br>(0.55; 1.64)  | 1                                                                             | 0.68<br>(0.41; 1.14)   |
|                                                                             | weaker (ref. better)                          | 1                                  | 0.26*<br>(0.08; 0.86)  | 1                       | 0.55<br>(0.22; 1.42)  | 1                                   | 1.06<br>(0.39; 2.90) | 1                               | 0.53<br>(0.23; 1.22)  | 1                                                                             | 0.80<br>(0.35; 1.81)   |
| Appetite in comparison with other people of the same age                    | as good (ref. better)                         | 1                                  | 0.11*<br>(0.01; 0.83)  | 1                       | 0.95<br>(0.37; 2.40)  | 1                                   | 0.64<br>(0.29; 1.41) | 1                               | 0.71<br>(0.34; 1.49)  | 1                                                                             | 0.75<br>(0.39; 1.42)   |
|                                                                             | weaker (ref. better)                          | 1                                  | 0.07*<br>(0.01; 0.57)  | 1                       | 0.51<br>(0.19; 1.38)  | 1                                   | 0.85<br>(0.34; 2.12) | 1                               | 0.37*<br>(0.16; 0.84) | 1                                                                             | 0.32**<br>(0.15; 0.68) |
| Feeling satiety after eating almost the whole meal                          | no (ref. yes)                                 | 1                                  | 1.32<br>(0.64; 2.70)   | 1                       | 1.16<br>(0.60; 2.23)  | 1                                   | 1.59<br>(0.85; 2.97) | 1                               | 1.53<br>(0.89; 2.63)  | 1                                                                             | 0.51*<br>(0.31; 0.86)  |
| <b>Components of the Health-related Limitations Score (H-LS)</b>            |                                               |                                    |                        |                         |                       |                                     |                      |                                 |                       |                                                                               |                        |
| Psychological stress or acute disease in the last 3 months                  | yes (ref. no)                                 | 1                                  | 0.67<br>(0.35; 1.29)   | 1                       | 0.96<br>(0.51; 1.78)  | 1                                   | 1.56<br>(0.87; 2.82) | 1                               | 1.06<br>(0.64; 1.75)  | 1                                                                             | 0.93<br>(0.58; 1.50)   |
| Neuropsychological problems                                                 | yes (ref. no)                                 | 1                                  | 1.11<br>(0.45; 2.72)   | 1                       | 0.94<br>(0.42; 2.09)  | 1                                   | 1.09<br>(0.50; 2.34) | 1                               | 0.76<br>(0.40; 1.45)  | 1                                                                             | 0.90<br>(0.47; 1.70)   |
| Taking more than 3 prescription drugs/day                                   | yes (ref. no)                                 | 1                                  | 1.16<br>(0.60; 2.25)   | 1                       | 0.51*<br>(0.27; 0.94) | 1                                   | 1.09<br>(0.63; 1.90) | 1                               | 0.88<br>(0.54; 1.44)  | 1                                                                             | 1.10<br>(0.69; 1.75)   |
| Self-reported health status in comparison with other people of the same age | weaker/does not know<br>(ref. as good/better) | 1                                  | 0.39**<br>(0.20; 0.74) | 1                       | 0.57<br>(0.31; 1.02)  | 1                                   | 1.13<br>(0.66; 1.95) | 1                               | 0.86<br>(0.53; 1.39)  | 1                                                                             | 0.52**<br>(0.33; 0.83) |
| Self-reported nutritional status                                            | malnourished/ does not know<br>(ref. good)    | 1                                  | 0.35**<br>(0.18; 0.69) | 1                       | 0.44*<br>(0.23; 0.84) | 1                                   | 0.88<br>(0.47; 1.66) | 1                               | 0.79<br>(0.45; 1.38)  | 1                                                                             | 0.84<br>(0.49; 1.45)   |

Notes: #data for components of the Health-related Limitations Score (H-LS); <sup>a</sup>in the last 3 months due to loss of appetite, digestive problems, chewing or swallowing difficulties etc.;  
<sup>b</sup>water, juice, coffee, tea, etc., excluding sweetened beverages coca-cola type; ORs were adjusted for: age (continuous variable in years) and SES score (continuous variable in points);  
p-value—level of significance assessed by Wald's test; \*p < 0.05; \*\*p < 0.01.
